# Supplementary material for: AR-induced ZEB1-AS1 represents poor prognosis in cholangiocarcinoma and facilitates tumor stemness, proliferation and invasion through mediating miR-133b/HOXB8
Source: publisher site journal article supplement (doi:10.18632/aging.102680), 2020-01-24
Supplement: Supplementary file [file aging-v12i2-102680-supplementary-material-SD1.pdf]

## SUPPLEMENTARY FIGURE

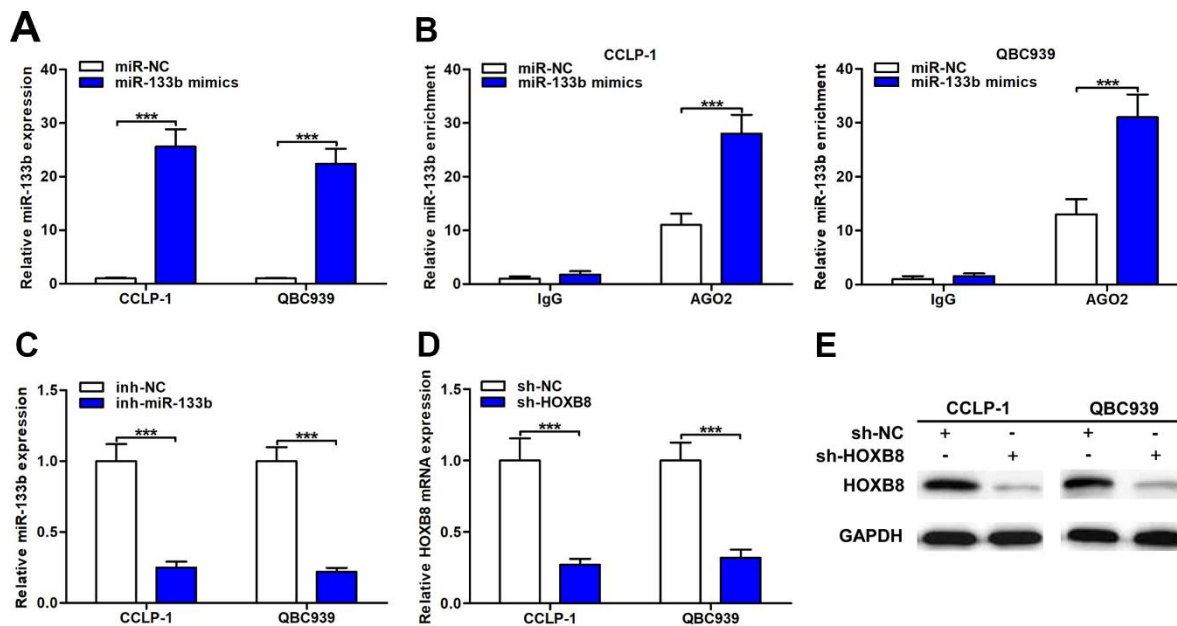

**Supplementary Figure 1. Knockdown efficiency and amplification efficiency.** (A) The amplification efficiency of miR-133b mimics in QBC939 and CCLP-1 cells. (B) The enrichment of miR-133b in AGO2 RIP assays. (C) The knockdown efficiency of inh-miR-133b in QBC939 and CCLP-1 cells. (D, E) The knockdown efficiency of sh-HOXB8 in QBC939 and CCLP-1 cells was analysed by qRT-PCR and western blot. \*\*\*  $P < 0.001$ .
