# Supplementary material for: AR-induced ZEB1-AS1 represents poor prognosis in cholangiocarcinoma and facilitates tumor stemness, proliferation and invasion through mediating miR-133b/HOXB8
Source: publisher site journal article supplement (doi:10.18632/aging.102680), 2020-01-24
Supplement: Supplementary file [file aging-v12i2-102680-supplementary-material-SD2.pdf]

## SUPPLEMENTARY TABLE

**Supplementary Table 1. Primer sequences for qRT-PCR and sequences for siRNA.**

| <b>Nucleic acids</b>        | <b>Sequences</b>                                                                                  |
|-----------------------------|---------------------------------------------------------------------------------------------------|
| ZEB1-AS1                    | Forward primer: 5'-TCCCTGCTAAGCTTCCTTCAGTGT-3'<br>Reverse primer: 5'-GACAGTGATCACTTTCATATCC-3'    |
| GAPDH                       | Forward primer: 5'-GGGAGCCAAAAGGGTCAT-3'<br>Reverse primer: 5'-GAGTCCTTCCACGATACCAA-3'            |
| ZEB1-AS1 promoter E1 region | Forward primer: 5'-GGGCTTGGATGGCGCT-3'<br>Reverse primer: 5'-ACCACATGTTTCAGGTCTCGAT-3'            |
| ZEB1-AS1 promoter E2 region | Forward primer: 5'-TTTCTGGTTATCTCGGGGCG-3'<br>Reverse primer: 5'-CTCTCGCCACAGGAACTGTC-3'          |
| ZEB1-AS1 promoter E3 region | Forward primer: 5'-TCCTGTCTAGAAGCAGATACGAA-3'<br>Reverse primer: 5'-TGCAATAGCCTATGCTCCACT-3'      |
| U6                          | Forward primer: 5'-GCTTCGGCAGCACATATACTAAAAT-3'<br>Reverse primer: 5'-CGCTTCACGAATTTGCGTGTCA-3'   |
| miR-133a-3p                 | Forward primer: 5'-ACACTCCAGCTGGGTTTGTCCCCTTCAAC-3'<br>Reverse primer: 5'-TGGTGTCGTGGAGTCG-3'     |
| miR-185-5p                  | Forward primer: 5'-TGAGGAGCCGATCACGTC-3'<br>Reverse primer: 5'-GTGCCGGTGCAGAGGT-3'                |
| miR-133b                    | Forward primer: 5'-CTCAGCTTTGGTCCCCTTCAAC-3'<br>Reverse primer: 5'-GTGCAGGGTCCGAGGT-3'            |
| miR-186-5p                  | Forward primer: 5'-AAGAATTCTCCTTTTGGGCT-3'<br>Reverse primer: 5'-GTGCGTGTCTGGAGTCG-3'             |
| miR-342-3p                  | Forward primer: 5'-TCCTCGCTCTCACACAGAAATC-3'<br>Reverse primer: 5'-TATGGTTGTTACGACTCCTTAC-3'      |
| miR-4739                    | Forward primer: 5'-GCTGGGACATTGAAAGTCTCA-3'<br>Reverse primer: 5'-GATGTTCCCATCGGCGTGTC-3'         |
| miR-4306                    | Forward primer: 5'-AAAGCGCCGCTGGAGAGA-3'<br>Reverse primer: 5'-TATGGTTGTTACGACTCCTTAC-3'          |
| miR-499a-5p                 | Forward primer: 5'-ATGTAGCGTGCGACCG-3'<br>Reverse primer: 5'-CAGGCTGACGCACTCTGTGCT-3'             |
| miR-5590-3p                 | Forward primer: 5'-CCCCCTTGTCATGTTCCCTGATCTT-3'<br>Reverse primer: 5'-GCAGAGGAAATGAAACCAGTATGT-3' |
| HOXB8                       | Forward primer: 5'-ACGTGCTTCTTTGTAATGACCA-3'<br>Reverse primer: 5'-TGTAACAATTGCCACAGCG-3'         |
| si-ZEB1-AS1-1               | 5'-GGGTGTAAGAACCCTGTA-3'                                                                          |
| si-ZEB1-AS1-2               | 5'-GAATCATAACCTTTATTGCA-3'                                                                        |
| sh-HOXB8                    | 5'-GCTCTTATTTCGTCAACTCACTGTTCTCC-3'                                                               |
